# Supplementary material
Source: ML conference proceedings conference paper supplement (https://openaccess.thecvf.com/content/CVPR2021/html/Heo_Guided_Interactive_Video_CVPR_2021_paper.html)
Supplement: Supplementary file 1 [file Heo_Guided_Interactive_Video_CVPR_2021_supplemental.zip]

# Supplemental Materials on Guided Interactive Video Object Segmentation Using Reliability-Based Attention Maps

Yuk Heo, Yeong Jun Koh, and Chang-Su Kim

## S-1. User Study

We conducted a user study with 12 participants to assess the proposed GIS algorithm in real applications, as described in Section 4.3 in the main paper. Table S-1 lists detailed results for each user: seconds per video (SPV), rounds per video (RPV), and J&F scores. Note that the average performances over all 12 users are reported in Table 4 in the main paper. Proposed-RS1 enabled most users to finish the interactive segmentation most quickly, requiring the fewest SPV. This is because it does not need the inspection time to select a frame to be annotated. Also, in terms of the three metrics, the proposed algorithm, regardless of its method (w/o RS, RS1, or RS4), is preferred to the conventional algorithm [7] by all users, except for only a few exceptions (*e.g.* User 7 required 1.52 RPV using [7], while 1.57 RPV using Proposed-RS1). Figure S-1 illustrates how a user performed the interactive VOS using Proposed-RS4.

Table S-1: Detailed user study results. The best results are boldfaced.

|     |                       | User 1       | User 2       | User 3       | User 4       | User 5       | User 6       | User 7       | User 8       | User 9       | User 10      | User 11      | User 12      |
|-----|-----------------------|--------------|--------------|--------------|--------------|--------------|--------------|--------------|--------------|--------------|--------------|--------------|--------------|
| SPV | Heo <i>et al.</i> [7] | 52.8         | 70.9         | 85.3         | 46.4         | 54.9         | 116.5        | 39.8         | 52.7         | 79.7         | 36.8         | 57.6         | 108.6        |
|     | Proposed w/o RS       | 33.2         | 38.9         | 47.7         | 33.6         | 37.6         | 70.8         | 27.4         | 38.1         | 52.0         | 25.1         | 57.6         | 89.9         |
|     | Proposed-RS1          | <b>23.4</b>  | <b>35.5</b>  | <b>27.4</b>  | <b>29.1</b>  | <b>23.2</b>  | <b>48.8</b>  | <b>24.5</b>  | <b>30.6</b>  | 38.1         | <b>21.1</b>  | <b>42.2</b>  | 71.2         |
|     | Proposed-RS4          | 24.8         | 41.0         | 33.0         | 29.9         | 30.0         | 55.7         | 27.2         | 33.7         | <b>31.0</b>  | 25.4         | 49.2         | <b>64.6</b>  |
| RPV | Heo <i>et al.</i> [7] | 2.13         | 2.90         | 3.43         | 2.13         | 1.90         | 3.30         | 1.52         | 2.07         | 2.80         | 1.47         | 2.23         | 3.10         |
|     | Proposed w/o RS       | 1.60         | <b>2.00</b>  | 2.03         | <b>1.40</b>  | 1.57         | 2.27         | <b>1.33</b>  | 1.57         | 2.30         | <b>1.33</b>  | 2.23         | 3.07         |
|     | Proposed-RS1          | 1.43         | 2.17         | <b>1.63</b>  | 1.80         | <b>1.53</b>  | <b>1.97</b>  | 1.57         | 1.50         | 1.97         | 1.40         | <b>1.87</b>  | 3.00         |
|     | Proposed-RS4          | <b>1.33</b>  | 2.03         | 1.83         | 1.53         | 1.67         | <b>1.97</b>  | 1.47         | <b>1.43</b>  | <b>1.53</b>  | 1.37         | 1.90         | <b>2.30</b>  |
| J&F | Heo <i>et al.</i> [7] | 0.753        | 0.775        | 0.776        | 0.750        | 0.756        | 0.799        | 0.754        | 0.768        | 0.782        | 0.698        | <b>0.813</b> | 0.808        |
|     | Proposed w/o RS       | 0.785        | 0.801        | <b>0.803</b> | <b>0.792</b> | 0.773        | 0.814        | 0.781        | 0.801        | 0.815        | 0.725        | <b>0.813</b> | 0.830        |
|     | Proposed-RS1          | 0.771        | <b>0.805</b> | 0.777        | 0.782        | 0.759        | 0.807        | 0.779        | <b>0.804</b> | <b>0.818</b> | 0.725        | 0.810        | 0.825        |
|     | Proposed-RS4          | <b>0.786</b> | 0.801        | 0.790        | 0.790        | <b>0.793</b> | <b>0.818</b> | <b>0.782</b> | 0.789        | 0.789        | <b>0.749</b> | <b>0.813</b> | <b>0.832</b> |

## S-2. Analysis on R-scores

We analyze the correlation between R-scores and J&F scores. In Figure S-2, we compare the average R-scores and J&F scores over frames for each sequence in DAVIS2017 [26] according to the interaction rounds. To clarify the relationship between the average R-score and the average J&F score, we omit sequences that have higher J&F scores than 0.9 in the first round, because those sequences do not require guidance using R-scores. We see that R-scores and J&F scores are highly correlated and both of them tend to increase as the round progresses.

## S-3. Implementation Details

**Intersection-aware propagation:** As mentioned in Section 3.2,  $Y_n$  is used to obtain the overlapped object feature. Specifically,  $Y_n$  is downsampled using the nearest-neighbor interpolation. Also, two convolution layers in the IAP module in Figure 5 have 256 filters of size  $5 \times 5$ .

**Segmentation head:** We adopt the decoder architecture in [7] as the segmentation head in Figure 2.  $F_t$ ,  $G_t$ , and  $H_t$  are concatenated and then fed into a  $1 \times 1$  convolution, which yields a feature of 512 channels. Using the output feature, the head generates segmentation results.

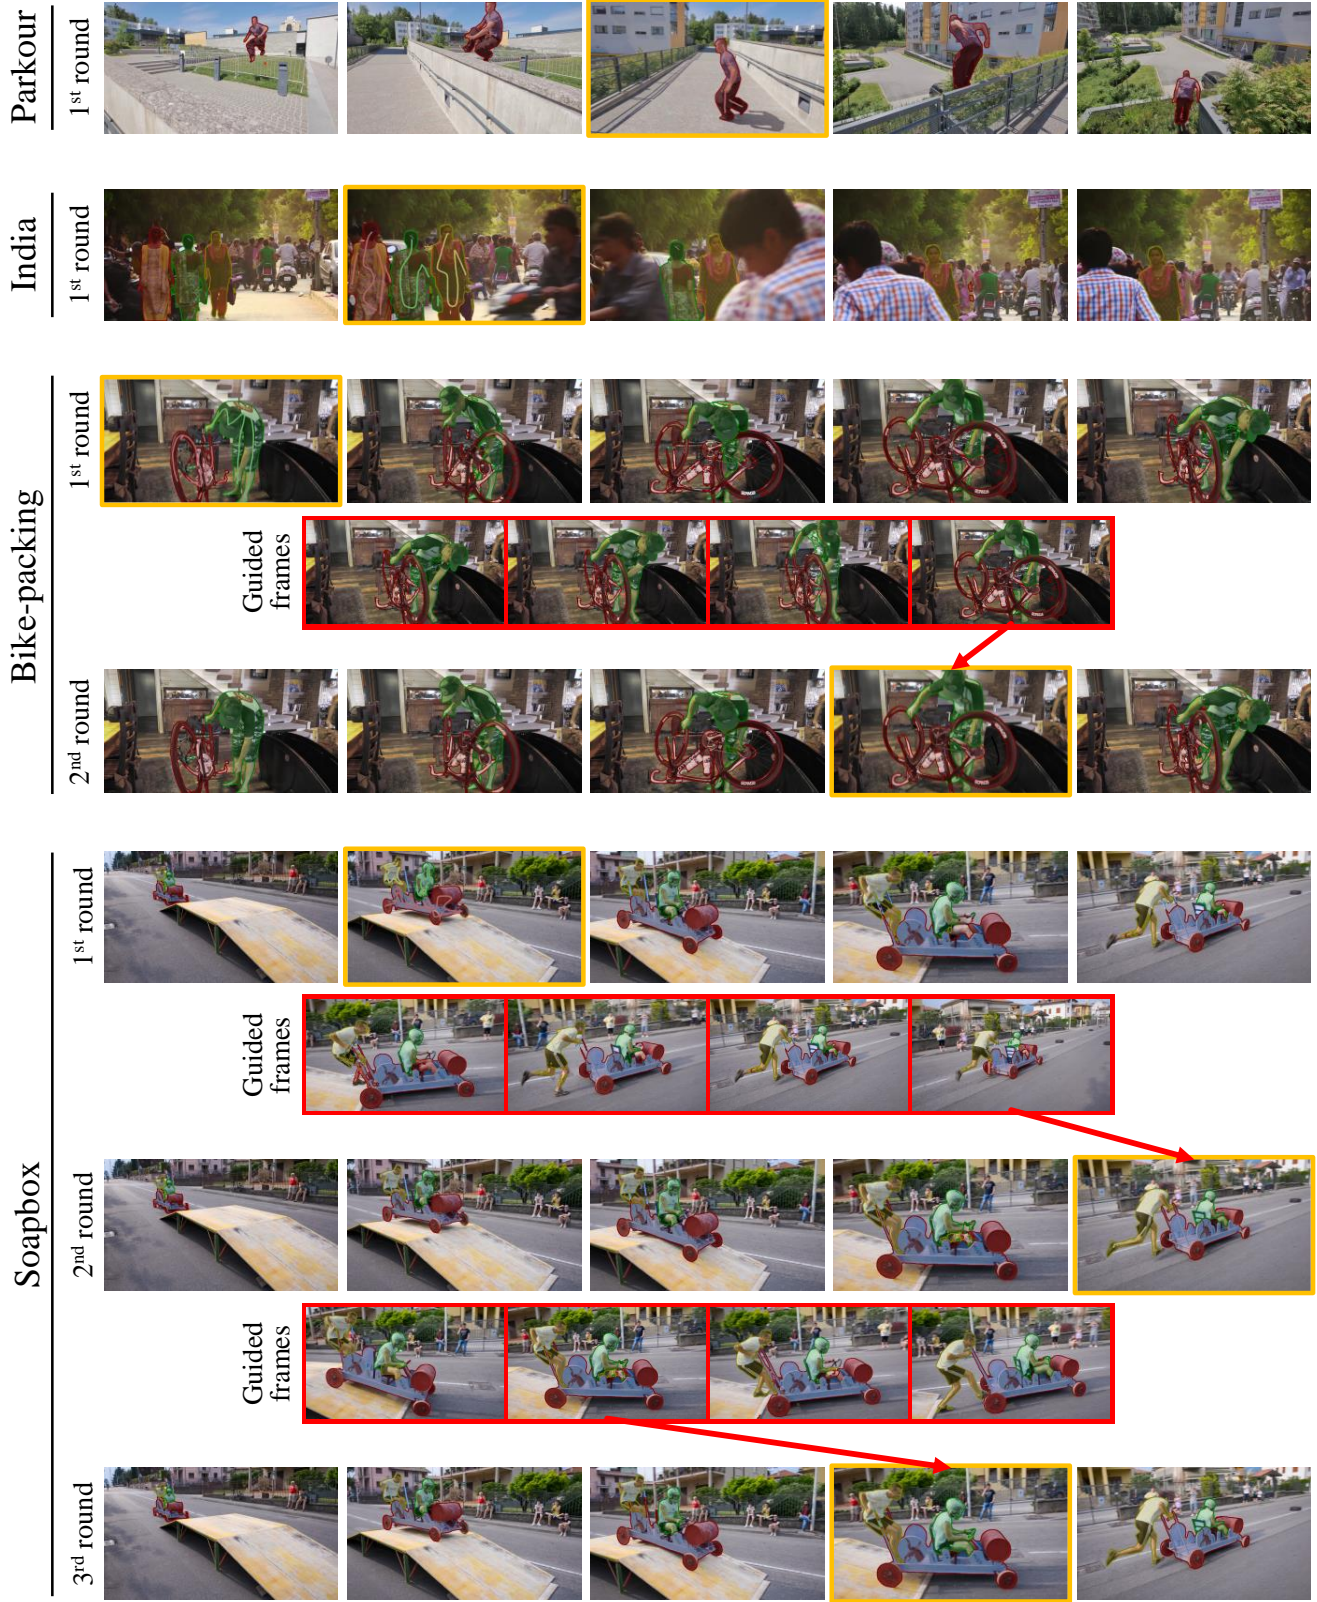

Figure S-1: Summary of how a user performed interactive VOS using Proposed-RS4. Yellow boxes are annotated frames, and red boxes are four guided frames provided by Proposed-RS4 in each round.

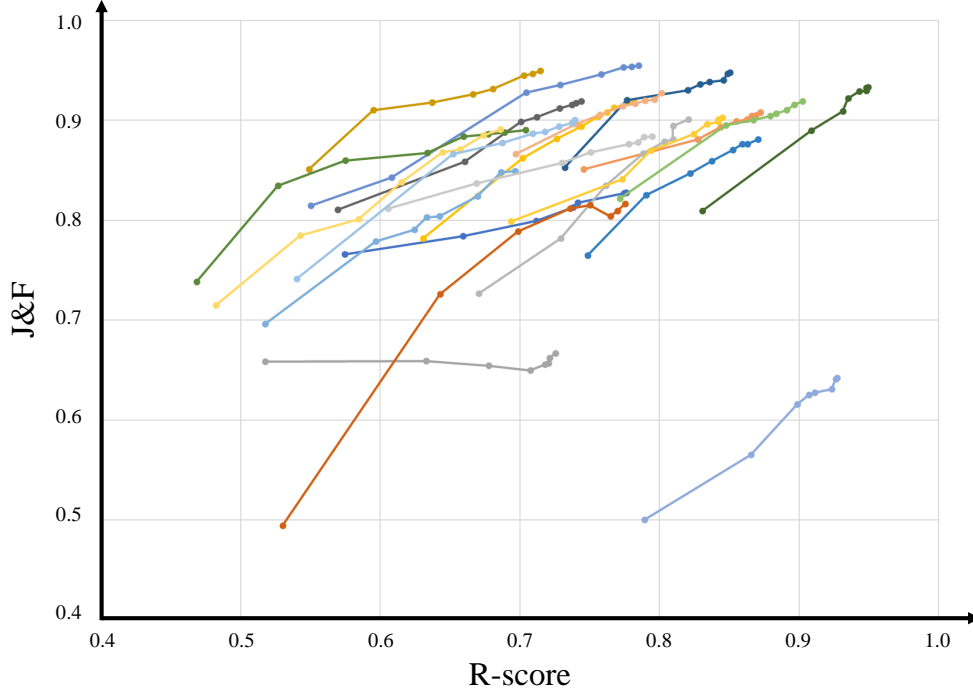

Figure S-2: Correlation between R-scores and J&F scores. Each video is represented in a different color.

**Training:** We employ the Adam optimizer to minimize the cross-entropy loss between segmentation prediction and the ground-truth. Starting with a learning rate of  $1.0 \times 10^{-5}$ , we decrease it by a factor of  $\frac{1}{5}$  in every 20 epochs. The training is iterated for 60 epochs with 6 mini-sequence batches. It takes three days for the convergence.

#### S-4. Alternatives to Intersection-Aware Propagation

In Table 3, we replace the intersection-aware propagation (IAP) module with two existing propagation methods, local distance map (LDM) [20] and local transfer module (LTM) [7]. Instead of using the proposed overlapped object feature  $\mathbf{H}_t$ , we perform the replacement as follows. First, as in LDM, we compute a distance between two feature vectors  $\mathbf{F}_t(p)$  and  $\mathbf{F}_n(q)$  for pixels  $p$  and  $q$ , which is given by

$$d(p, q) = 1 - \frac{2}{1 + \exp(\|\phi_D(\mathbf{F}_t(p)) - \phi_D(\mathbf{F}_n(q))\|^2)} \quad (1)$$

where  $\phi_D$  is a feature transform for LDM. Then, the local distance map  $L_t$  for target frame  $I_t$  is defined as

$$L_t(p) = \begin{cases} \min_{q \in \mathcal{O}_n \cap \mathcal{N}(p)} d(p, q) & \text{if } \mathcal{O}_n \cap \mathcal{N}(p) \neq \emptyset, \\ 1 & \text{otherwise,} \end{cases} \quad (2)$$

where  $\mathcal{O}_n$  is the union set of pixels in the segmented object regions in the neighbor frame and  $\mathcal{N}(p)$  is a  $13 \times 13$  neighbor set of pixel  $p$ . Second, to implement LTM, we estimate a local affinity  $\mathbf{W}^L$  between two feature vectors  $\mathbf{F}_t(p)$  and  $\mathbf{F}_n(q)$ ,

$$\mathbf{W}^L(p, q) = \begin{cases} \phi_T(\mathbf{F}_t(p)) \cdot \phi_T(\mathbf{F}_n(q))^T & q \in \mathcal{N}(p), \\ 0 & \text{otherwise,} \end{cases} \quad (3)$$

where  $\phi_T$  is a feature transform for LTM. Then  $\mathbf{W}^L$  is normalized column-by-column to yield the transition matrix  $\mathbf{A}^L$ . By multiplying  $\mathbf{A}^L$  and the downsampled probability  $\hat{Y}_n^L$  from the neighboring probability map  $\hat{Y}_n$ , we obtain the output of LTM. Eventually, LDM and LTM replace IAP by employing  $L_t \in \mathbb{R}^{HW \times 1}$  and  $\mathbf{A}^L \hat{Y}_n^L \in \mathbb{R}^{HW \times 1}$ , instead of  $\mathbf{H}_t \in \mathbb{R}^{HW \times C_3}$ , respectively. Note that  $\phi_D$  and  $\phi_T$  output 128-channel features by employing  $1 \times 1$  convolution.
